# Supplementary material
Source: publisher site journal article supplement (https://www.dovepress.com/article/312003)
Supplement: Supplementary file 1 [file get_supplementary_file.php]

TableS1

|          | logFC    | AveExpr  | t        | P.Value  | adj.P.Val | B        |
|----------|----------|----------|----------|----------|-----------|----------|
| REG4     | -2.89305 | 9.544579 | -10.3958 | 2.54E-22 | 1.36E-20  | 39.94666 |
| AGR3     | -2.22871 | 8.930969 | -10.9863 | 2.01E-24 | 1.55E-22  | 44.71442 |
| RAB27B   | -2.21023 | 7.441571 | -18.7192 | 3.74E-55 | 3.78E-51  | 114.5799 |
| SDR16C5  | -1.93035 | 7.014166 | -11.2219 | 2.82E-25 | 2.61E-23  | 46.6533  |
| TCN1     | -1.85682 | 6.82317  | -8.0745  | 1.02E-14 | 1.59E-13  | 22.73306 |
| ADGRG6   | -1.81989 | 5.926502 | -13.1979 | 9.78E-33 | 3.18E-30  | 63.60526 |
| PLA2G4A  | -1.74405 | 5.838875 | -11.0824 | 9.05E-25 | 7.39E-23  | 45.5033  |
| SERPINB5 | -1.74357 | 8.309643 | -10.3099 | 5.07E-22 | 2.56E-20  | 39.26488 |
| TFAP2A   | -1.68171 | 5.454897 | -14.3163 | 3.82E-37 | 3.85E-34  | 73.6291  |
| SPINK4   | -1.6136  | 8.776745 | -6.02826 | 4.09E-09 | 2.8E-08   | 10.13577 |
| CTSE     | -1.6044  | 6.838898 | -8.63198 | 1.95E-16 | 3.98E-15  | 26.61605 |
| FCGBP    | -1.5128  | 8.392687 | -6.18299 | 1.7E-09  | 1.23E-08  | 10.9883  |
| SLCO1B3  | -1.51128 | 5.320374 | -7.41524 | 8.71E-13 | 1.01E-11  | 18.37615 |
| CEL      | 2.318585 | 6.344262 | 11.00726 | 1.69E-24 | 1.32E-22  | 44.88636 |
| KRT23    | 2.273736 | 6.615432 | 11.31859 | 1.25E-25 | 1.21E-23  | 47.45513 |
| SLC26A3  | 2.009392 | 7.150588 | 6.769677 | 5.23E-11 | 4.72E-10  | 14.37666 |
| RUBCNL   | 1.970377 | 7.778101 | 11.50744 | 2.53E-26 | 2.72E-24  | 49.02982 |
| MYH11    | 1.903204 | 9.221218 | 12.49919 | 4.81E-30 | 1.02E-27  | 57.48486 |
| REEP1    | 1.818463 | 5.619698 | 13.31041 | 3.56E-33 | 1.28E-30  | 64.60204 |
| SFRP4    | 1.795291 | 6.513059 | 9.925614 | 1.08E-20 | 4.36E-19  | 36.25196 |
| ACTG2    | 1.779983 | 8.945612 | 10.62032 | 4.1E-23  | 2.49E-21  | 41.74358 |
| SYNPO2   | 1.739943 | 7.393695 | 10.03367 | 4.6E-21  | 1.98E-19  | 37.0927  |
| MAB21L2  | 1.722769 | 6.322637 | 10.22402 | 1.01E-21 | 4.79E-20  | 38.58598 |
| QPRT     | 1.716562 | 8.009988 | 14.22605 | 8.75E-37 | 8.4E-34   | 72.81106 |
| MYL9     | 1.69783  | 8.841805 | 13.2943  | 4.12E-33 | 1.46E-30  | 64.45914 |
| SYNM     | 1.683323 | 6.703974 | 9.581713 | 1.58E-19 | 5.33E-18  | 33.61124 |
| CXCL14   | 1.670459 | 9.064356 | 8.034439 | 1.34E-14 | 2.05E-13  | 22.46085 |
| MGP      | 1.656094 | 9.050951 | 11.71153 | 4.45E-27 | 5.61E-25  | 50.74498 |
| SFRP2    | 1.653999 | 8.028507 | 6.707321 | 7.65E-11 | 6.77E-10  | 14.0051  |
| EREG     | 1.634361 | 6.213049 | 8.184156 | 4.74E-15 | 7.72E-14  | 23.48295 |
| CNN1     | 1.62866  | 7.581827 | 11.09771 | 7.96E-25 | 6.58E-23  | 45.62909 |
| FBLN1    | 1.59999  | 7.729346 | 15.15657 | 1.61E-40 | 3.25E-37  | 81.30397 |
| TNS1     | 1.546248 | 8.365228 | 11.39836 | 6.38E-26 | 6.43E-24  | 48.11884 |
| EPDR1    | 1.542739 | 7.678185 | 12.41607 | 9.98E-30 | 2.03E-27  | 56.7652  |
| CES1     | 1.538057 | 6.394436 | 11.92582 | 7.07E-28 | 1.06E-25  | 52.56029 |
| GNG4     | 1.537407 | 6.13266  | 11.66709 | 6.51E-27 | 7.92E-25  | 50.37042 |
| CELP     | 1.526216 | 5.726344 | 11.74547 | 3.33E-27 | 4.28E-25  | 51.03158 |
| DES      | 1.517898 | 6.931006 | 8.655929 | 1.64E-16 | 3.4E-15   | 26.78676 |
| TAGLN    | 1.517533 | 10.54894 | 11.50978 | 2.48E-26 | 2.68E-24  | 49.04946 |

TableS2

|       | logFC    | AveExpr  | t        | P.Value  | adj.P.Val | B        |
|-------|----------|----------|----------|----------|-----------|----------|
| SFRP2 | 2.281532 | 7.503002 | 12.9151  | 1.14E-33 | 8.33E-32  | 65.6499  |
| GAS1  | 1.912562 | 6.100004 | 14.48789 | 9.45E-41 | 1.42E-38  | 81.79933 |
| MGP   | 1.7559   | 8.785936 | 17.98391 | 1.17E-57 | 3.37E-54  | 120.3918 |
| ASPN  | 1.750579 | 7.513244 | 14.70145 | 9.64E-42 | 1.65E-39  | 84.0607  |
| SFRP4 | 1.693257 | 6.172424 | 12.20063 | 1.35E-30 | 7.74E-29  | 58.64495 |
| FND1  | 1.686221 | 5.543073 | 14.49509 | 8.75E-41 | 1.33E-38  | 81.87532 |

|         |          |          |          |          |          |          |
|---------|----------|----------|----------|----------|----------|----------|
| TNS1    | 1.646758 | 8.093194 | 18.12185 | 2.38E-58 | 9.59E-55 | 121.9701 |
| COL8A1  | 1.628395 | 7.395437 | 13.4428  | 5.32E-36 | 4.81E-34 | 70.96301 |
| CCDC80  | 1.626153 | 6.430752 | 15.9844  | 7.99E-48 | 3.29E-45 | 97.93965 |
| THBS2   | 1.621661 | 8.185149 | 13.01624 | 4.11E-34 | 3.15E-32 | 66.65942 |
| TAGLN   | 1.607047 | 10.22435 | 17.13876 | 1.86E-53 | 2.06E-50 | 110.7977 |
| MAB21L2 | 1.568841 | 6.102136 | 13.25097 | 3.79E-35 | 3.16E-33 | 69.01854 |
| GREM1   | 1.566209 | 8.225272 | 11.95284 | 1.49E-29 | 7.72E-28 | 56.26962 |
| PLN     | 1.536239 | 6.188601 | 13.19618 | 6.63E-35 | 5.41E-33 | 68.46584 |
| ACTG2   | 1.531185 | 8.751055 | 12.57137 | 3.53E-32 | 2.29E-30 | 62.25178 |
| SYNPO2  | 1.512935 | 7.26485  | 12.28714 | 5.8E-31  | 3.42E-29 | 59.48101 |
| CTHRC1  | 1.510758 | 9.084055 | 12.28846 | 5.72E-31 | 3.39E-29 | 59.49385 |
| CNN1    | 1.504374 | 7.281841 | 14.22626 | 1.52E-39 | 2.04E-37 | 79.04974 |
| SPOCK1  | 1.501333 | 6.457401 | 13.8829  | 5.58E-38 | 5.95E-36 | 75.47777 |

TableS3

|         | logFC    | AveExpr  | t        | P.Value  | adj.P.Val | B        |
|---------|----------|----------|----------|----------|-----------|----------|
| SFRP2   | 2.982962 | 8.138403 | 11.85971 | 3.53E-26 | 2.47E-24  | 48.74126 |
| SFRP4   | 2.648856 | 6.599418 | 13.699   | 1.85E-32 | 2.99E-30  | 63.0499  |
| MGP     | 2.565794 | 9.114312 | 18.13977 | 6.02E-48 | 2.43E-44  | 98.35139 |
| MYH11   | 2.527259 | 9.386122 | 14.37553 | 8.31E-35 | 1.88E-32  | 68.40317 |
| SYNPO2  | 2.513658 | 7.555737 | 12.57871 | 1.31E-28 | 1.18E-26  | 54.27957 |
| ACTG2   | 2.510625 | 9.074209 | 13.22823 | 7.81E-31 | 9.84E-29  | 59.34722 |
| MAB21L2 | 2.496191 | 6.504461 | 13.17977 | 1.15E-30 | 1.43E-28  | 58.96736 |
| MYL9    | 2.465313 | 8.904893 | 18.54524 | 2.37E-49 | 1.19E-45  | 101.5516 |
| ASPN    | 2.444509 | 7.826866 | 14.03875 | 1.23E-33 | 2.3E-31   | 65.73422 |
| TNS1    | 2.408772 | 8.4468   | 17.96446 | 2.44E-47 | 8.22E-44  | 96.96469 |
| CNN1    | 2.376003 | 7.729871 | 14.45466 | 4.4E-35  | 1.03E-32  | 69.0313  |
| SYNM    | 2.368903 | 6.92223  | 11.45845 | 7.71E-25 | 4.44E-23  | 45.69076 |
| TAGLN   | 2.335206 | 10.59256 | 17.74069 | 1.47E-46 | 4.23E-43  | 95.19212 |
| FNDC1   | 2.32589  | 5.937008 | 13.96241 | 2.27E-33 | 4.12E-31  | 65.13029 |
| COL8A1  | 2.268456 | 7.665204 | 13.4183  | 1.73E-31 | 2.44E-29  | 60.8395  |
| THBS2   | 2.223254 | 8.520164 | 13.05283 | 3.13E-30 | 3.71E-28  | 57.97353 |
| PLN     | 2.219133 | 6.56376  | 11.59402 | 2.73E-25 | 1.69E-23  | 46.71784 |
| DES     | 2.179587 | 7.100664 | 10.55195 | 7.2E-22  | 2.96E-20  | 38.93107 |
| GAS1    | 2.16418  | 6.671086 | 10.7916  | 1.2E-22  | 5.53E-21  | 40.69845 |
| MYLK    | 2.144231 | 9.710214 | 16.60159 | 1.38E-42 | 1.27E-39  | 86.13603 |
| CCDC80  | 2.143942 | 6.840307 | 14.11671 | 6.6E-34  | 1.31E-31  | 66.35141 |
| PTGIS   | 2.137627 | 7.27822  | 14.98894 | 6.03E-37 | 2.03E-34  | 73.27969 |
| FBLN1   | 2.115296 | 7.792026 | 19.3952  | 2.79E-52 | 2.81E-48  | 108.2231 |
| CEL     | 2.059628 | 6.507292 | 7.619777 | 4.86E-13 | 6.55E-12  | 18.89817 |
| EFEMP1  | 1.995306 | 8.060134 | 14.51422 | 2.73E-35 | 6.72E-33  | 69.50425 |
| APOD    | 1.969551 | 6.998489 | 12.07775 | 6.52E-27 | 4.91E-25  | 50.4116  |
| GREM1   | 1.968373 | 8.50667  | 10.06529 | 2.59E-20 | 8.97E-19  | 35.39131 |
| KRT23   | 1.961534 | 6.654159 | 7.849719 | 1.12E-13 | 1.65E-12  | 20.33806 |
| COMP    | 1.96079  | 5.764758 | 11.34977 | 1.77E-24 | 9.82E-23  | 44.8702  |
| REEP1   | 1.95867  | 5.785745 | 11.77111 | 6.99E-26 | 4.62E-24  | 48.06498 |
| TPM2    | 1.950739 | 9.055753 | 15.41933 | 1.89E-38 | 8.92E-36  | 76.70887 |
| C3      | 1.929467 | 9.346754 | 12.89376 | 1.1E-29  | 1.17E-27  | 56.73096 |
| ZCCHC24 | 1.922175 | 7.561709 | 19.93066 | 4.09E-54 | 8.25E-50  | 112.3966 |
| LMOD1   | 1.916857 | 6.645059 | 14.3912  | 7.33E-35 | 1.68E-32  | 68.52753 |

|           |          |          |          |          |          |          |
|-----------|----------|----------|----------|----------|----------|----------|
| IGFBP5    | 1.907711 | 9.25096  | 14.93359 | 9.41E-37 | 3.06E-34 | 72.83901 |
| LINC01279 | 1.902436 | 5.957541 | 12.34994 | 7.83E-28 | 6.5E-26  | 52.50834 |
| SPOCK1    | 1.892908 | 6.825311 | 11.38861 | 1.31E-24 | 7.47E-23 | 45.16318 |
| TIMP3     | 1.891612 | 8.932581 | 15.2282  | 8.79E-38 | 3.48E-35 | 75.18548 |
| AKAP12    | 1.889976 | 7.596456 | 12.64686 | 7.66E-29 | 7.18E-27 | 54.80868 |
| AOC3      | 1.859539 | 6.601324 | 14.74707 | 4.21E-36 | 1.27E-33 | 71.3549  |
| FN1       | 1.857162 | 11.26067 | 12.51367 | 2.18E-28 | 1.92E-26 | 53.7752  |
| FERMT2    | 1.851961 | 8.01718  | 14.70727 | 5.8E-36  | 1.7E-33  | 71.03845 |
| GUCY1A1   | 1.825153 | 7.554359 | 15.29822 | 5E-38    | 2.15E-35 | 75.74353 |
| COL14A1   | 1.816162 | 6.03061  | 14.55584 | 1.96E-35 | 4.99E-33 | 69.83481 |
| MRGPRF    | 1.812405 | 6.239655 | 15.6848  | 2.22E-39 | 1.32E-36 | 78.8257  |
| PCDH7     | 1.810919 | 5.740792 | 11.11582 | 1.05E-23 | 5.37E-22 | 43.11278 |
| FHL1      | 1.800539 | 8.390034 | 13.37504 | 2.44E-31 | 3.34E-29 | 60.4995  |
| COL11A1   | 1.798927 | 7.529216 | 7.904611 | 7.87E-14 | 1.18E-12 | 20.68567 |
| RUBCNL    | 1.798429 | 7.840241 | 8.614594 | 7.15E-16 | 1.4E-14  | 25.30903 |
| SERPINF1  | 1.797142 | 9.133268 | 15.94697 | 2.69E-40 | 1.94E-37 | 80.91668 |
| EREG      | 1.796988 | 6.170052 | 7.462251 | 1.31E-12 | 1.65E-11 | 17.92733 |
| ANTXR1    | 1.796328 | 9.021678 | 13.80897 | 7.71E-33 | 1.3E-30  | 63.91775 |
| OGN       | 1.767683 | 4.525702 | 9.860095 | 1.15E-19 | 3.61E-18 | 33.92026 |
| ACTA2     | 1.767523 | 11.32468 | 18.99104 | 6.84E-51 | 4.6E-47  | 105.0575 |
| ISLR      | 1.756238 | 6.957737 | 14.23558 | 2.55E-34 | 5.47E-32 | 67.29322 |
| FXYD6     | 1.751866 | 7.188516 | 17.34666 | 3.46E-45 | 6.97E-42 | 92.0651  |
| CRYAB     | 1.743567 | 6.916108 | 16.61833 | 1.21E-42 | 1.16E-39 | 86.26939 |
| CHRD1     | 1.743297 | 5.487131 | 10.06773 | 2.55E-20 | 8.83E-19 | 35.40891 |
| CES1      | 1.742851 | 6.46136  | 10.95522 | 3.52E-23 | 1.71E-21 | 41.9136  |
| MMP2      | 1.737306 | 9.722282 | 15.30991 | 4.56E-38 | 2E-35    | 75.83664 |
| FIBIN     | 1.735664 | 6.835378 | 15.27099 | 6.23E-38 | 2.62E-35 | 75.52651 |
| FBN1      | 1.729462 | 8.657065 | 14.62885 | 1.09E-35 | 2.93E-33 | 70.41499 |
| OLFML3    | 1.725371 | 7.388126 | 16.15652 | 4.98E-41 | 3.72E-38 | 82.58792 |
| COL6A2    | 1.723941 | 9.249124 | 14.1957  | 3.51E-34 | 7.22E-32 | 66.97716 |
| HSPB8     | 1.714407 | 6.315757 | 12.60392 | 1.07E-28 | 9.79E-27 | 54.4752  |
| NTM       | 1.714308 | 6.732815 | 10.15057 | 1.39E-20 | 5.03E-19 | 36.00656 |
| SPARCL1   | 1.712647 | 9.099785 | 14.23429 | 2.58E-34 | 5.47E-32 | 67.283   |
| C1S       | 1.695489 | 9.895098 | 16.71079 | 5.73E-43 | 6.43E-40 | 87.00598 |
| AEBP1     | 1.689288 | 8.461054 | 13.97553 | 2.04E-33 | 3.74E-31 | 65.23403 |
| PDLIM3    | 1.685151 | 7.416413 | 15.49892 | 9.94E-39 | 4.95E-36 | 77.3434  |
| MEIS1     | 1.68491  | 6.01119  | 13.33784 | 3.27E-31 | 4.34E-29 | 60.20735 |
| DCN       | 1.673346 | 10.69295 | 14.18577 | 3.8E-34  | 7.74E-32 | 66.89849 |
| DPYSL3    | 1.657125 | 7.824863 | 13.57607 | 4.93E-32 | 7.48E-30 | 62.08093 |
| COL5A1    | 1.655148 | 9.032897 | 13.53556 | 6.81E-32 | 9.95E-30 | 61.76194 |
| TNC       | 1.64595  | 8.29838  | 9.620102 | 6.46E-19 | 1.85E-17 | 32.21709 |
| CTHRC1    | 1.643291 | 9.420157 | 9.292864 | 6.59E-18 | 1.67E-16 | 29.92683 |
| KCNMB1    | 1.639447 | 6.181107 | 12.2909  | 1.24E-27 | 1.01E-25 | 52.0525  |
| COL10A1   | 1.635185 | 6.915796 | 7.816825 | 1.38E-13 | 2.01E-12 | 20.13045 |
| SULF1     | 1.612805 | 9.479259 | 10.84935 | 7.8E-23  | 3.67E-21 | 41.1266  |
| BGN       | 1.611155 | 8.00753  | 12.64305 | 7.89E-29 | 7.37E-27 | 54.77904 |
| TAC1      | 1.610411 | 3.988357 | 8.654516 | 5.45E-16 | 1.09E-14 | 25.57565 |
| SERPING1  | 1.60773  | 7.95693  | 13.27644 | 5.33E-31 | 6.93E-29 | 59.72539 |
| ZEB1      | 1.598488 | 7.261848 | 12.15874 | 3.47E-27 | 2.64E-25 | 51.03423 |
| C1R       | 1.596152 | 8.982998 | 17.01871 | 4.82E-44 | 6.07E-41 | 89.45755 |

|           |          |          |          |          |          |          |
|-----------|----------|----------|----------|----------|----------|----------|
| VCAN      | 1.59198  | 9.683743 | 12.99433 | 4.96E-30 | 5.72E-28 | 57.51624 |
| PGM5      | 1.591293 | 5.604201 | 8.373889 | 3.61E-15 | 6.42E-14 | 23.71599 |
| MAP1B     | 1.586177 | 6.4311   | 13.73943 | 1.34E-32 | 2.22E-30 | 63.3688  |
| NDN       | 1.583663 | 6.795643 | 16.46561 | 4.13E-42 | 3.62E-39 | 85.05232 |
| ADAM12    | 1.582617 | 6.297666 | 8.866342 | 1.28E-16 | 2.81E-15 | 27.00152 |
| DDR2      | 1.580951 | 7.642829 | 14.14764 | 5.15E-34 | 1.04E-31 | 66.59639 |
| HOPX      | 1.580526 | 7.56657  | 10.42586 | 1.83E-21 | 7.28E-20 | 38.00745 |
| PPP1R14A  | 1.580064 | 5.601588 | 13.34564 | 3.08E-31 | 4.11E-29 | 60.26862 |
| TIMP2     | 1.579823 | 10.13915 | 15.59986 | 4.41E-39 | 2.38E-36 | 78.14832 |
| DMD       | 1.579445 | 5.439456 | 10.76816 | 1.43E-22 | 6.51E-21 | 40.52494 |
| MFAP5     | 1.572966 | 6.255584 | 10.10266 | 1.97E-20 | 6.96E-19 | 35.66066 |
| TMEM47    | 1.57239  | 7.321581 | 11.82145 | 4.74E-26 | 3.24E-24 | 48.44901 |
| RUNX1T1   | 1.570091 | 5.515445 | 14.07698 | 9.07E-34 | 1.74E-31 | 66.03684 |
| MIR100HG  | 1.559847 | 4.291066 | 11.05561 | 1.65E-23 | 8.3E-22  | 42.66249 |
| MXRA5     | 1.558462 | 8.968166 | 11.49212 | 5.96E-25 | 3.49E-23 | 45.94551 |
| MRVI1     | 1.556508 | 7.843495 | 17.23858 | 8.23E-45 | 1.28E-41 | 91.20615 |
| SMOC2     | 1.538446 | 7.347064 | 7.957803 | 5.58E-14 | 8.59E-13 | 21.02393 |
| SDC2      | 1.530047 | 7.666799 | 13.94109 | 2.69E-33 | 4.8E-31  | 64.96172 |
| EPDR1     | 1.522336 | 7.749761 | 10.09086 | 2.15E-20 | 7.55E-19 | 35.57555 |
| GJC1      | 1.521975 | 5.913402 | 13.23594 | 7.34E-31 | 9.32E-29 | 59.40766 |
| TUBB6     | 1.520646 | 8.173868 | 15.24678 | 7.57E-38 | 3.12E-35 | 75.33353 |
| AQP1      | 1.516142 | 7.408365 | 12.52662 | 1.97E-28 | 1.74E-26 | 53.87558 |
| PCP4      | 1.513479 | 5.194552 | 8.135482 | 1.75E-14 | 2.84E-13 | 22.16365 |
| RARRES2   | 1.513334 | 8.563874 | 14.50022 | 3.06E-35 | 7.25E-33 | 69.39305 |
| PPP1R3C   | 1.512926 | 5.253007 | 13.92806 | 2.98E-33 | 5.27E-31 | 64.85868 |
| RBMS1     | 1.512008 | 8.271979 | 15.2239  | 9.1E-38  | 3.53E-35 | 75.15121 |
| COL15A1   | 1.510223 | 9.014701 | 11.80963 | 5.19E-26 | 3.53E-24 | 48.35879 |
| NNMT      | 1.509893 | 9.219132 | 12.5382  | 1.8E-28  | 1.6E-26  | 53.96536 |
| MFAP4     | 1.507529 | 6.155167 | 15.92907 | 3.11E-40 | 2.16E-37 | 80.77389 |
| LHFPL6    | 1.505933 | 7.002667 | 15.56394 | 5.89E-39 | 3.05E-36 | 77.86191 |
| WWTR1     | 1.505047 | 8.098097 | 10.85412 | 7.53E-23 | 3.55E-21 | 41.16198 |
| REG4      | -3.4188  | 9.338702 | -10.2533 | 6.54E-21 | 2.43E-19 | 36.75064 |
| AGR3      | -2.56069 | 8.873468 | -10.8295 | 9.06E-23 | 4.24E-21 | 40.97898 |
| RAB27B    | -2.20956 | 7.386044 | -15.0624 | 3.34E-37 | 1.16E-34 | 73.8643  |
| FCGBP     | -2.19668 | 8.361627 | -7.63335 | 4.46E-13 | 6.05E-12 | 18.98239 |
| SPINK4    | -2.16042 | 8.630281 | -6.7306  | 1.09E-10 | 1.05E-09 | 13.59521 |
| TCN1      | -2.13365 | 6.71218  | -8.01002 | 3.97E-14 | 6.21E-13 | 21.35729 |
| MUC2      | -2.08564 | 9.072001 | -7.50395 | 1.01E-12 | 1.29E-11 | 18.18306 |
| SDR16C5   | -1.95092 | 6.94895  | -9.23867 | 9.64E-18 | 2.4E-16  | 29.55125 |
| SERPINB5  | -1.84307 | 8.163634 | -8.59412 | 8.21E-16 | 1.59E-14 | 25.17253 |
| TNFRSF11A | -1.82604 | 7.464733 | -11.9492 | 1.77E-26 | 1.28E-24 | 49.42594 |
| CLCA1     | -1.76179 | 7.994022 | -4.63873 | 5.58E-06 | 2.49E-05 | 3.082475 |
| HEPACAM3  | -1.7607  | 5.99279  | -6.20332 | 2.19E-09 | 1.76E-08 | 10.66807 |
| REG1A     | -1.74852 | 8.049481 | -4.63323 | 5.72E-06 | 2.55E-05 | 3.058989 |
| C2CD4A    | -1.67254 | 7.355595 | -9.90082 | 8.57E-20 | 2.73E-18 | 34.21118 |
| SMIM31    | -1.64583 | 6.464383 | -9.42262 | 2.64E-18 | 7.02E-17 | 30.83042 |
| ITLN1     | -1.62621 | 7.434112 | -4.96644 | 1.24E-06 | 6.21E-06 | 4.524496 |
| ADGRG6    | -1.60777 | 5.828422 | -9.37802 | 3.61E-18 | 9.48E-17 | 30.51914 |
| CTSE      | -1.60681 | 6.702314 | -7.28778 | 3.85E-12 | 4.52E-11 | 16.86732 |
| L1TD1     | -1.60207 | 6.156143 | -6.60153 | 2.31E-10 | 2.13E-09 | 12.86295 |

|           |          |          |          |          |          |          |
|-----------|----------|----------|----------|----------|----------|----------|
| PLA2G4A   | -1.58941 | 5.812257 | -8.448   | 2.2E-15  | 4.02E-14 | 24.2038  |
| TFAP2A    | -1.57957 | 5.421921 | -11.1214 | 1E-23    | 5.16E-22 | 43.15488 |
| ST6GALNA  | -1.55928 | 8.870691 | -7.17707 | 7.59E-12 | 8.57E-11 | 16.20328 |
| LINC00261 | -1.5313  | 6.856864 | -7.48123 | 1.16E-12 | 1.47E-11 | 18.04359 |
| PIGR      | -1.52004 | 11.34602 | -5.16533 | 4.81E-07 | 2.58E-06 | 5.439156 |
| TFF1      | -1.51885 | 10.39573 | -6.04863 | 5.11E-09 | 3.85E-08 | 9.842562 |
